# Supplementary material for: Hydrophobically Coated Superparamagnetic Iron Oxides Nanoparticles Incorporated into Polymer-Based Nanocapsules Dispersed in Water
Source: MDPI journal article supplement (doi:10.3390/ma13051219), 2020-03-09
Supplement: s1 [file s1]

Supplementary Information

# Hydrophobically Coated Superparamagnetic Iron Oxides Nanoparticles Incorporated into Polymer-Based Nanocapsules Dispersed in Water

Elżbieta Gumieniczek-Chłopek <sup>1,2</sup>, Joanna Odrobińska <sup>2</sup>, Tomasz Strączek <sup>1</sup>,  
Agnieszka Radziszewska <sup>3</sup>, Szczepan Zapotoczny <sup>2,\*</sup> and Czesław Kapusta <sup>1,\*</sup>

<sup>1</sup> Faculty of Physics and Applied Computer Science, AGH University of Science and Technology, Mickiewicza Av. 30, 30-059 Krakow, Poland; echlopek@agh.edu.pl (E.G.-C.); t.straczek@gmail.com (T.S.);

<sup>2</sup> Jagiellonian University, Faculty of Chemistry, Gronostajowa 2, 30-387 Krakow, Poland; odrobinska@chemia.uj.edu.pl

<sup>3</sup> AGH University of Science and Technology, Faculty of Metals Engineering and Industrial Computer Science, Mickiewicza Av. 30, 30-059 Krakow, Poland; radzisz@agh.edu.pl

\* Correspondence: zapotocz@chemia.uj.edu.pl (S.Z.), kapusta@agh.edu.pl (C.K.)

Received: 7 February 2020; Accepted: 2 March 2020; Published: date

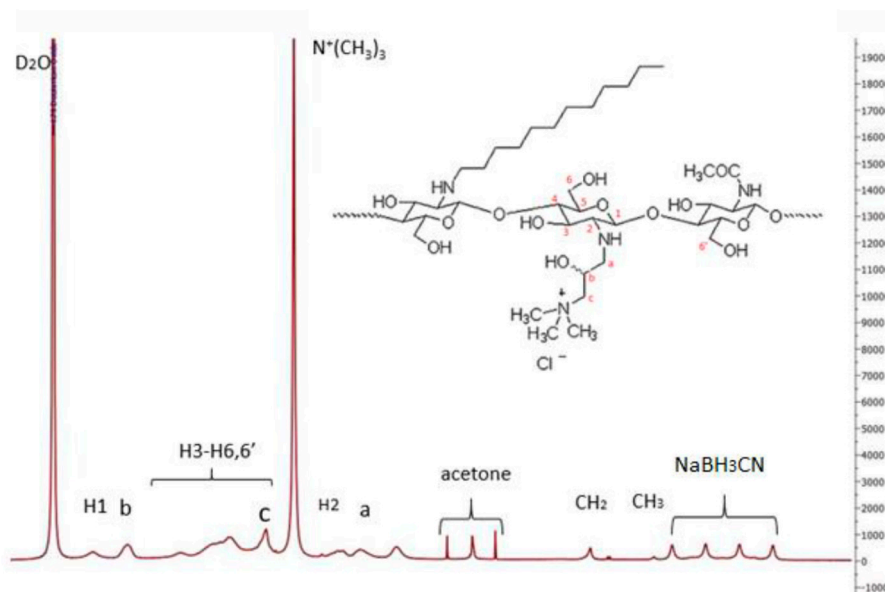

**Figure S1.** NMR spectrum of the amphiphilic chitosan derivative containing quaternary ammonium and N-dodecyl groups.

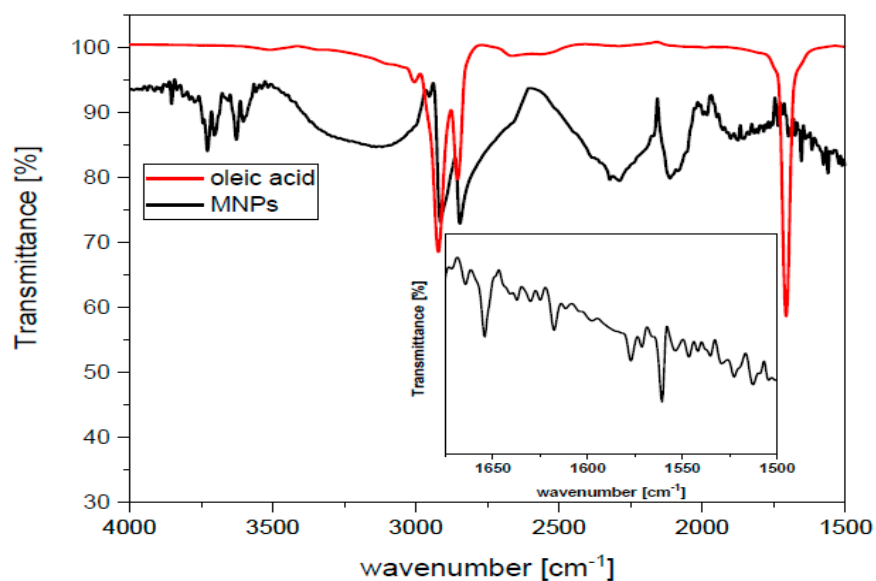

**Figure S2.** FT-IR spectra of oleic acid and magnetic nanoparticles (MNPs) coated by oleic acid. The inset shows the magnified part of the spectrum.

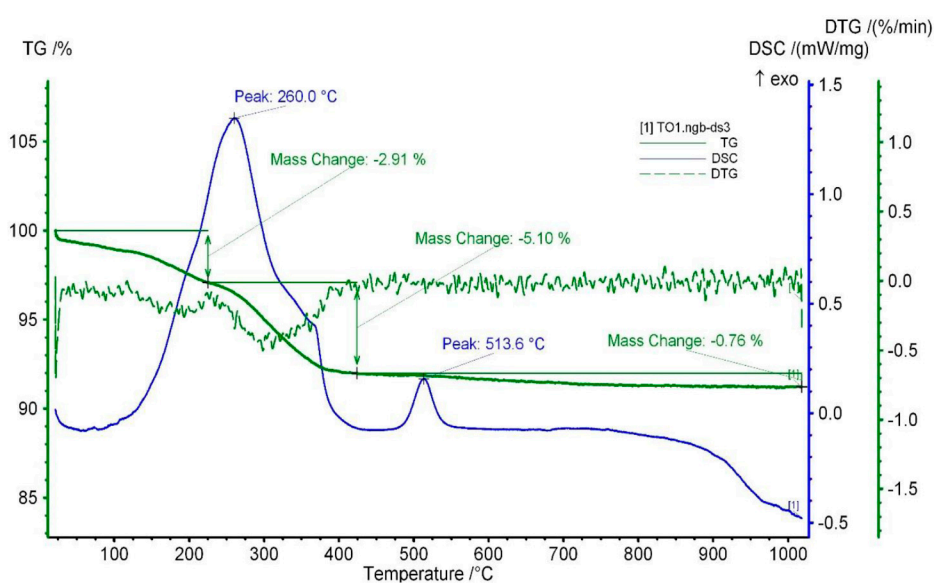

**Figure S3.** Thermal analysis (TGA-DSC) of the magnetic nanoparticles coated by oleic acid.

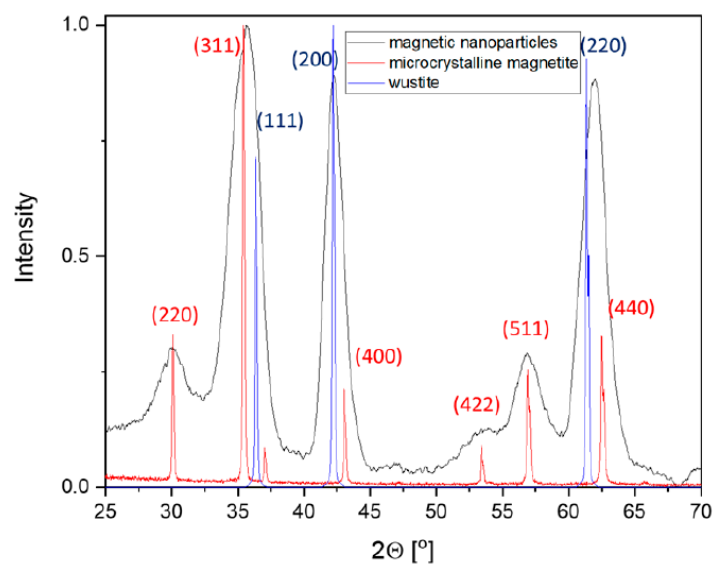

**Figure S4.** XRD diffraction patterns of magnetic nanoparticles, maghemite and wüstite.

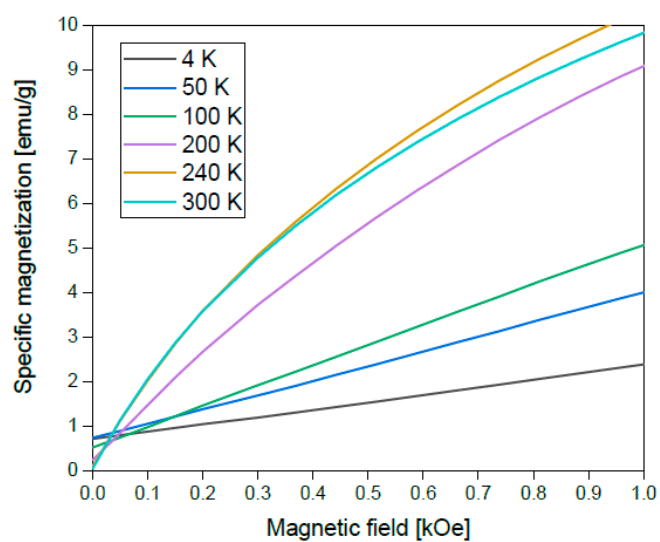

**Figure S5.** Virgin magnetization curves at 4–300 K temperature range.
